# Supplementary material
Source: PubMed Central journal article supplement (PMC3186436)

# IP: InsP<sub>3</sub>R1

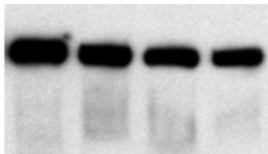

-InsP<sub>3</sub>R1

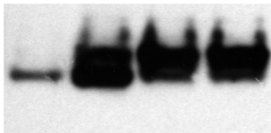

-NCS-1-HA  
-NCS-1

1

2

3

4

Supplement: supp_M111.265751_SupplFig2.pdf [file supp_M111.265751_SupplFig2.pdf]
